# Supplementary material for: Additive Manufacturing of Multi‐Scale Porous Soft Tissue Implants That Encourage Vascularization and Tissue Ingrowth
Source: PubMed Central journal article supplement (PMC11469332; doi:10.1002/adhm.202100229), 2021-06-24
Supplement: ADHM-10-2100229-s003.pdf [file ADHM-10-2100229-s003.pdf]

# ADVANCED HEALTHCARE MATERIALS

## Supporting Information

for *Adv. Healthcare Mater.*, DOI: 10.1002/adhm.202100229

Additive Manufacturing of Multi-scale Porous Soft Tissue Implants that Encourage Vascularization and Tissue Ingrowth

*Fergal B. Coulter, Ruth E. Levey, Scott T. Robinson, Eimear B. Dolan, Stefano Deotti, Michael Monaghan, Peter Dockery, Brian S. Coulter, Liam P. Burke, Aoife J. Lowery, Rachel Beatty, Ryan Paetzold, James J. Prendergast, Gabriella Bellavia, Stefania Straino, Francesca Cianfarani, Monica Salamone, Carmelo M. Bruno, Kevin M. Moerman, Giulio Gherzi, Garry P. Duffy,\* Eoin D. O'Cearbhaill\**

## Additive Manufacturing of Multi-scale Porous Soft Tissue Implants that Encourage Vascularization and Tissue Ingrowth

Fergal B. Coulter<sup>1†</sup>, Ruth E. Levey<sup>2†</sup>, Scott T. Robinson<sup>2,3†</sup>, Eimear B. Dolan<sup>2,4</sup>, Stefano Deotti<sup>1</sup>, Michael Monaghan<sup>5</sup>, Peter Dockery<sup>2</sup>, Brian S. Coulter, Liam P. Burke<sup>6</sup>, Aoife J. Lowery<sup>7</sup>, Rachel Beatty<sup>2</sup>, Ryan Paetzold<sup>1</sup>, James J. Prendergast<sup>2</sup>, Gabriella Bellavia<sup>8</sup>, Stefania Straino<sup>8</sup>, Francesca Cianfarani<sup>8</sup>, Monica Salamone<sup>9</sup>, Carmelo M. Bruno<sup>9</sup>, Kevin M. Moerman<sup>5,11</sup>, Giulio Gherzi<sup>9,10</sup>, Garry P. Duffy<sup>2,3,12,\*</sup>, Eoin D. O'Cearbhaill<sup>1,13,\*</sup>

### List of Supplementary Materials

#### Supplementary Materials and Methods:

- S1.0** 3D printing hardware design
- S2.0** Rope-coil parameter analysis
- S3.0** Printer parameters for Spray Deposition
- S4.0** Quantitative analysis of blood vessels
- S5.0** Implantation of drug eluting pouch

#### Supplemental Figures

- Figure S1:** 3D Printer Design and Optimisation of Liquid Rope Coiling
- Figure S2:** Analysis of Curvature, 2D Voids and LCR Coating Heights
- Figure S3:** Mechanical Integrity of Rope Coil layers
- Figure S4:** Micropore analysis
- Figure S5:** Explants seen by transillumination and Micro C/T
- Figure S6:** Images from surgical procedure

#### Supplemental Tables

- Table S1 :** Statistical Analysis methods for Histological analysis.

**Table S2:** ANOVA for mean loop widths and amplitudes at different deposition heights (varying head speed and material flow rate)

**Table S3:** Analysis of Curvature, 2D Voids, LCR Coating Heights and Micropore distribution  
Mean Curvature Analysis

### **Supplemental Videos**

**Movie S1:** Process Overview & Demonstrator fabrication

**Movie S2:** Micro/CT of explanted devices

### **Supporting Information**

#### **S1.0 3D printing hardware design**

A three axis computer numeric controlled (CNC) gantry (Stepcraft QSeries 420) was customised with a fourth (rotational) axis, heated print platen and a printhead that incorporated a volumetric paste extruder (Viscotec EOpen EC300), an atomising spray valve (Techcon TS5540 MS) and a measurement laser (Keyence LK-G5000). The various pneumatic and electronic control systems were designed and integrated into a single controller, such that each device was addressable and controlled during the course of a print. The entire assembly was placed inside an enclosure with filtered extraction to remove solvent vapours.

The print head is positioned with precision ball-screws and can repeatably place the toolhead within 0.01 mm in X,Y and Z direction. The A axis can position to within 0.1 minute of a degree. The limiting factor in this case (as with most 3D printers) is the nozzle aperture (and therefore filament diameter) and material flow rate. In this paper we use a 200 $\mu$ m nozzle with a minimum dispensing 'dot size' of 1 $\mu$ L, which limits any feature size that can be printed to at least that volume and diameter.

The quoted scan accuracy of the Keyence is 800nm though this accuracy is dependent on the specularly and absorbance of the substrate being scanned. Empirically we see this accuracy as being

to within 2 $\mu$ m in the Z direction. As discussed above, the scanning system requires the substrate surface to be sampled and computed with interpolated, then lofted curves, which can introduce an inaccuracy

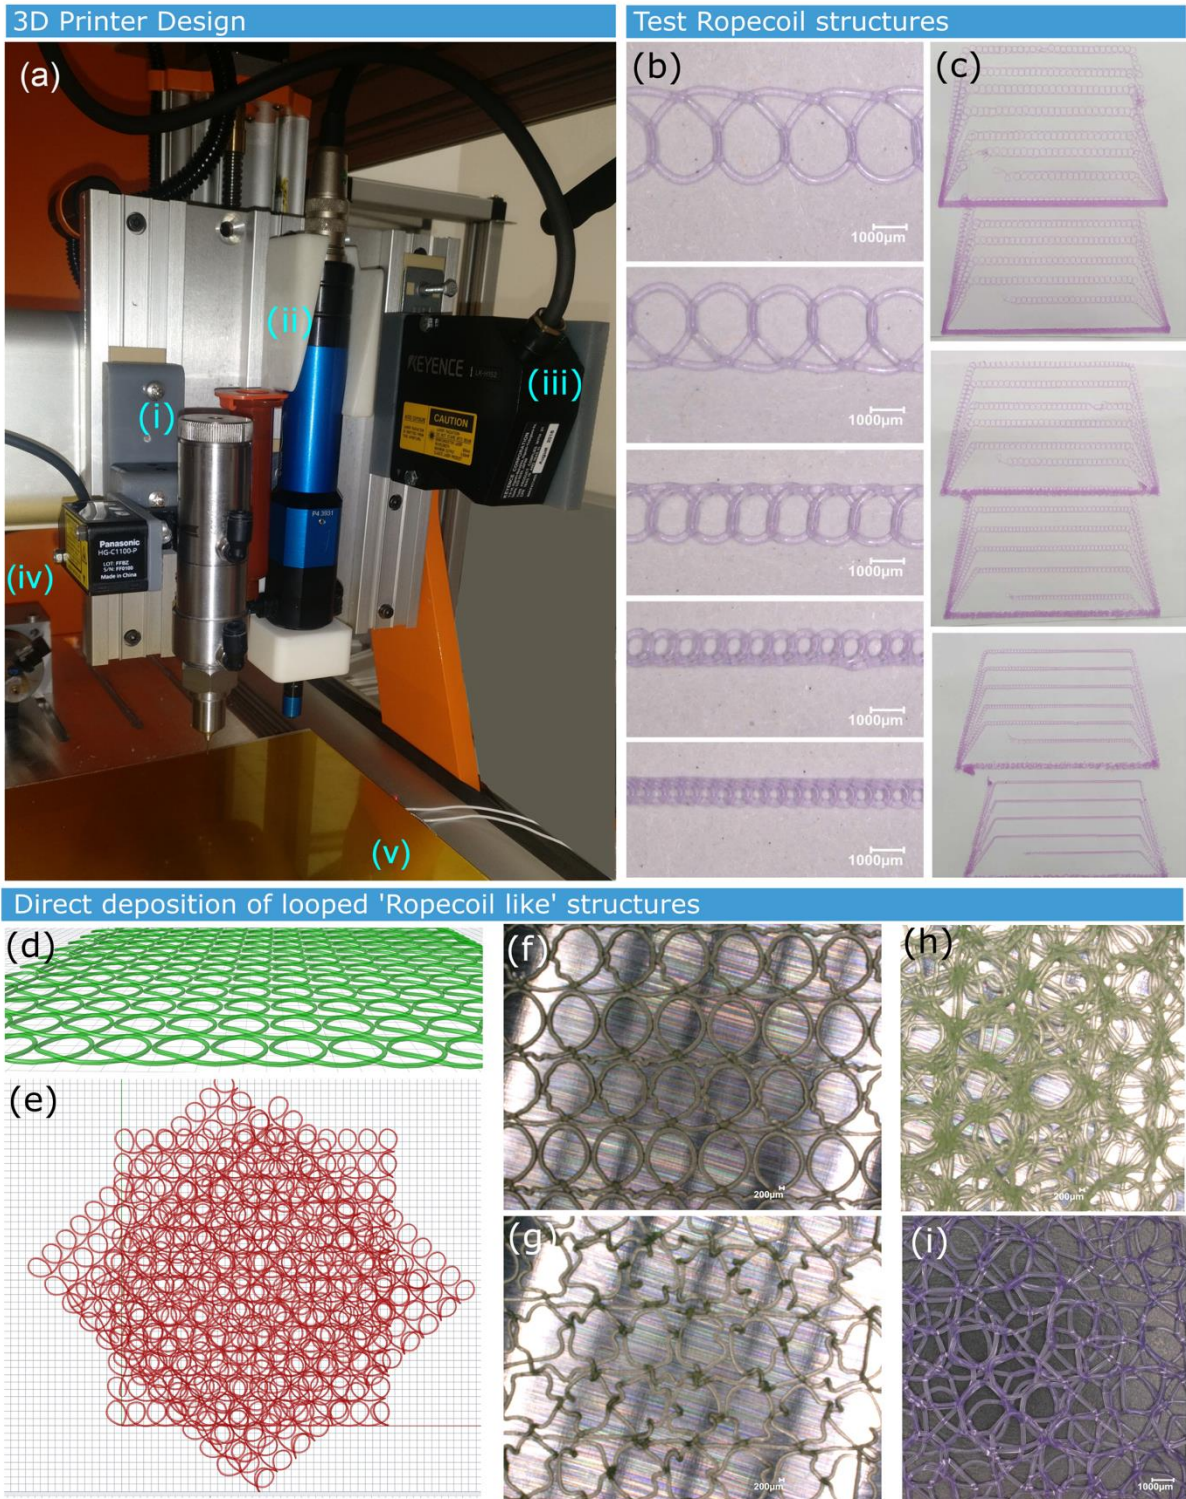

**Figure S1:** 3D Printer Design and Optimisation of Liquid Rope Coiling (A) 3D Printer Design. (B) Close up of Rope Coil structures used to calculate loop widths and heights. (C) Zoomed out version of various rope coil test structures (D) Toolpath used when printing is attempted using an explicit looping toolpath – Oblique view of a single layer (E) Three Layer full toolpaths (F) Example of a single layer when printed using explicit toolpath – nozzle at 200µm above substrate (G) Example of how the same toolpath prints when print head is 600µm above substrate (H) Sample output for three-layer explicit toolpath looped 'rope-coil like' structure (I) Example of three-layer Liquid Rope Coil coating.

## **S2.0 Rope-coil parameter analysis**

### Parameters for rope-coil layers

Printing parameters used in implants were dependant on the material required:

MED4820 : Q = 140  $\mu$ l/min, V = 620mm/min, H = 9mm.

MED4840 : Q = 160  $\mu$ l/min, V = 640mm/min, H = 9mm.

Following deposition, the silicone is cured at 120°C for 12 minutes.

To compare a Liquid Rope Coil Coating to that of a similar looped geometry but printed with a traditional explicitly specified toolpath, we first create a toolpath with a looped form as per Fig S1 (C). Note the slight lift of the print nozzle at the intersection points for each loop. The toolpath is duplicated and rotated by  $\pm 45^\circ$  and moved to 400  $\mu$ m and 600  $\mu$ m in the Z direction, as shown in Fig S1 (D). The first layer (printed with nozzle at 200  $\mu$ m height) is similar to a standard single layer when deposited using the liquid rope coil effect – Fig S1 (F). Subsequent layers do not print so smoothly, as there is little to no support structure underneath. To make this absolutely obvious, we show what happens when the print-head is positioned 600  $\mu$ m from the substrate in Fig S1 (G). A three-layer structure, when printed with explicit toolpath is shown Fig S1 (H). Even though there is an underlying layer structure at 0  $\mu$ m and 200  $\mu$ m, the porosity is such that there is little to support stacked layers. In the end, we see wavy, uneven lines stacking on top of each other. By way of comparison, a three-layer structure printed by harnessing the liquid rope coil effect is shown in Fig S1 (I)

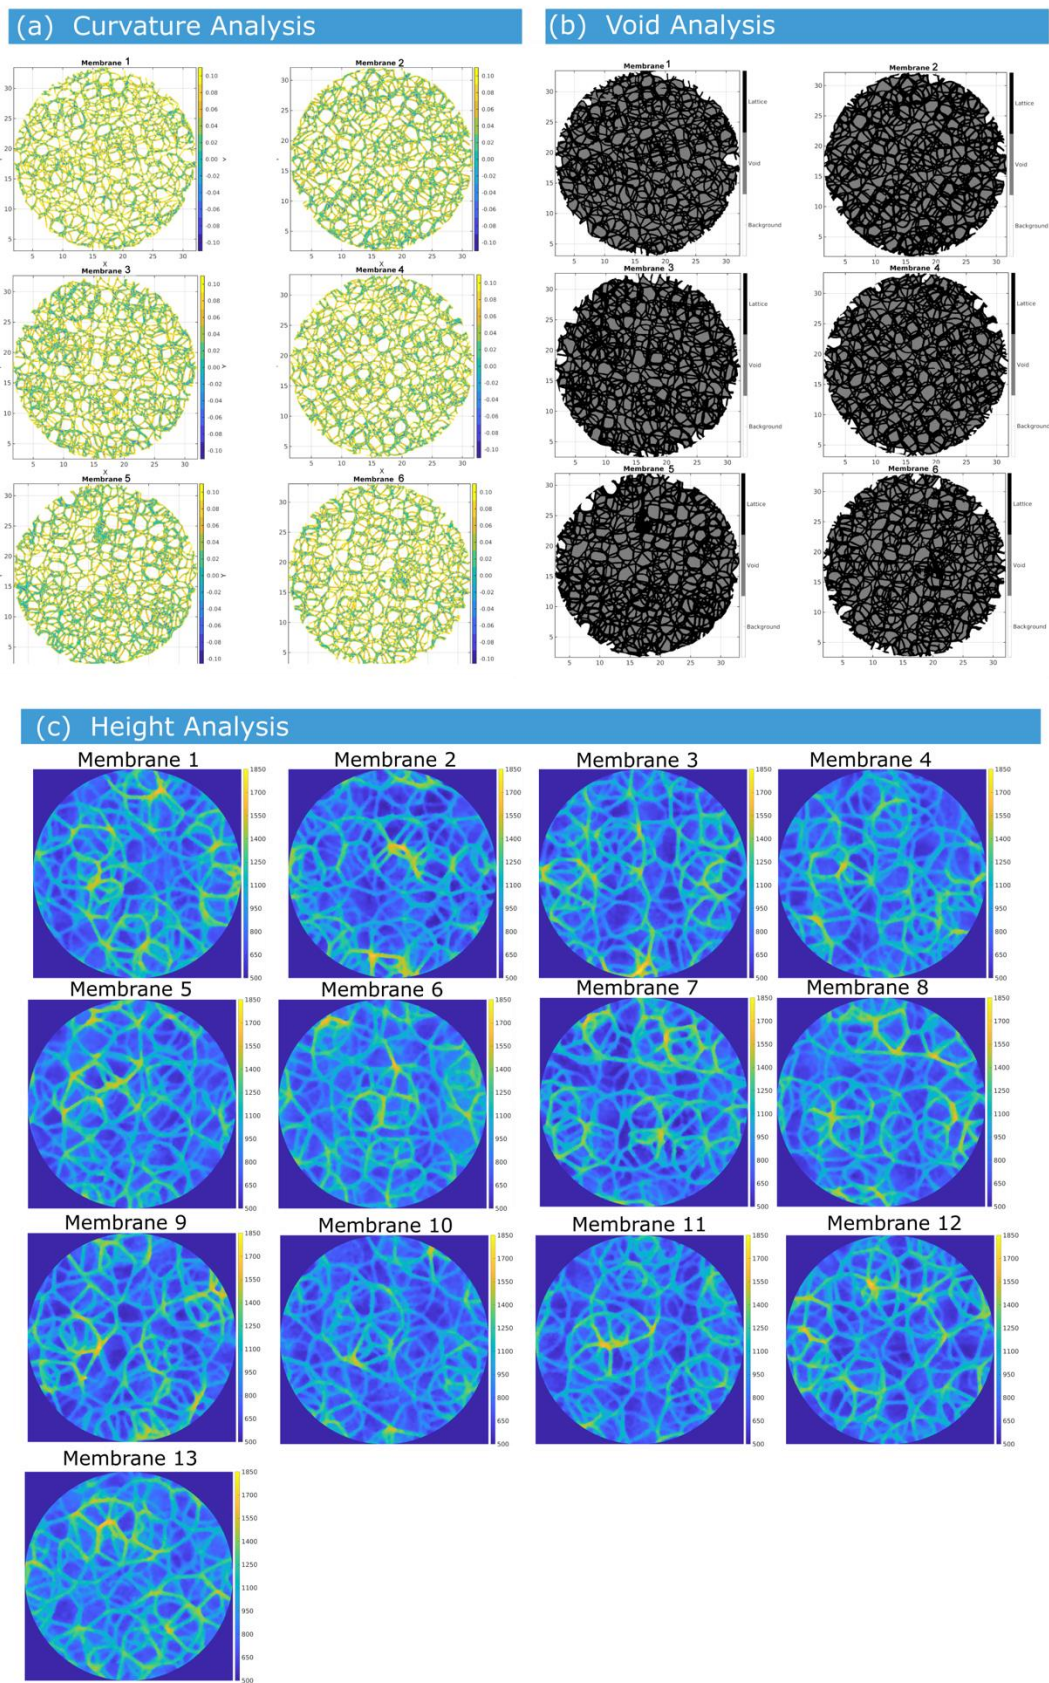

**Figure S2:** Analysis of Curvature, 2D Voids, LCR Coating Heights and Micropore distribution. (A) Representative Images of LRC Coating Curvature Analysis. (B) Representative Images of LRC Coating 2D Void Analysis. (C) Representative Images of LRC Coating height analysis.

### ***S2.1 Curvature, Height and Void Analysis***

Confirmation of repeatability across multiple LRC coatings was ascertained as described in the main paper. With curvature analysis - we see from box-plots in Fig. 1N that there is a definite trend. An ANOVA was performed on the data, but this did not show statistical significance. Instead we saw two distinct populations. The first was Membranes 1-4 ( $p=0.6386$ ), and second 5 & 6 ( $p=0.5838$ ). This distinction between populations can be explained by a manufacturing defect which was not noticed until after tests were performed, which could be eliminated in the future by improved in-process monitoring. In Fig S2 (A), we see a hyper-dense lump of material (green) in membrane 5 & 6. This problem occurs when a small air bubble creates a discontinuity in the flow of material. This results in material sticking to, and bunching up on the nozzle tip for a moment during printing. This lump eventually falls off, and rope-coiling continues as normal. The transparency of the silicone makes visual inspection of these defects challenging, and as such a more reliable in-process quality control method when future scale-up in a more controlled manufacturing environment is considered.

### ***S2.2 Mechanical integrity of Rope Coil layers***

To confirm the mechanical integrity of deposited rope coil layers in particular their ability to bond to an underlying substrate, a set of multi-layer test tokens were fabricated and tested using a mechanical tensile tester (Zwick/Roell Z5050). For each test piece two aluminium squares were coated with a silicone membrane (NuSil MED 4840) and cured. The two pieces were placed side by side in the 3D printer and a series of three stacked rope-coil layers (NuSil MED 4820) were extruded upon the membrane. The first layer was either oriented in the direction of or perpendicular to the direction of force. The subsequent two layers were extruded at  $45^\circ$  and then  $135^\circ$  to the force. Such a layer and material configuration corresponds to the fabrication of the implanted device, described later in Fig. 7. Samples were subsequently stretched in tension at 20 mm/min (as described in 4.11.5) and in all cases achieved a strain at failure in excess of 100% (Fig. S3). The average maximum force was  $3.601 \pm 0.59$  N when LRC orientation was in the direction of the force and  $6.936 \pm 1.27$  N



when LRC was perpendicular to the direction of force (\*\* $p=0.0021$ ,  $n=5$ /group, Fig. S3(A-D)). Importantly, the failure mode in all cases was the sequential breaking of rope coil fibres, while no debonding from the substrate was observed. This is indicative, as would be expected, that a covalent bond is achieved between the rope coiled layers and the underlying substrate of the same material. The average force at first failure (break of first rope coil fibre) was defined as >2% drop in force during testing. The average force at first failure was  $3.05\pm 0.30$  N when LRC orientation was in the direction of the force and  $5.118\pm 1.32$  N when LRC was perpendicular to the direction of force (\*\* $p=0.0079$ ,  $n=5$ /group, Fig. S3(E)). Cyclical testing was performed ( $n=6$ ) as described in ASTM 412. Samples were cyclically tested to 100% strain and two feed-rates were used (20 min/min for 20 cycles and 500 mm/min for 50 cycles). Representative curves are shown in Fig. S3(F), hysteresis was observed with no difference between feed-rates. Samples were examined after cyclical testing and there was no evidence of rope coil delamination from the underlying substrate.

Performance of the ropecoil layers under oscillatory shear was examined by selecting the first three samples from the collection illustrated in Fig S2(c). These samples were tested using a Rheometer (Anton Paar MCR502e) with a 2% Conical plate geometry with roughened surface. The tests were performed at a constant distance of 0.8mm - therefore displacement controlled. This distance was chosen as corresponding approximately to the third quartile of measured heights across the samples.

An amplitude sweep was first performed at a constant frequency. Sweeps were performed up to 10% shear strain. The Storage Modulus ( $G'$ ) and Loss Modulus ( $G''$ ) are plotted in Fig S3(G). Subsequent tests were performed, where the sample was firstly subjected to 1% shear strain at 1Hz for 6 hours, followed by 10% shear strain at 10Hz for 1 hour. These plots are shown in Fig S3(H and I). We can see from these graphs that both  $G'$  and  $G''$  remain constant for each sample over the course of the experiment, thus demonstrating that the coating is not delaminating and remaining coherent when subjected to higher local shear than might be expected for a sub muscular implant.

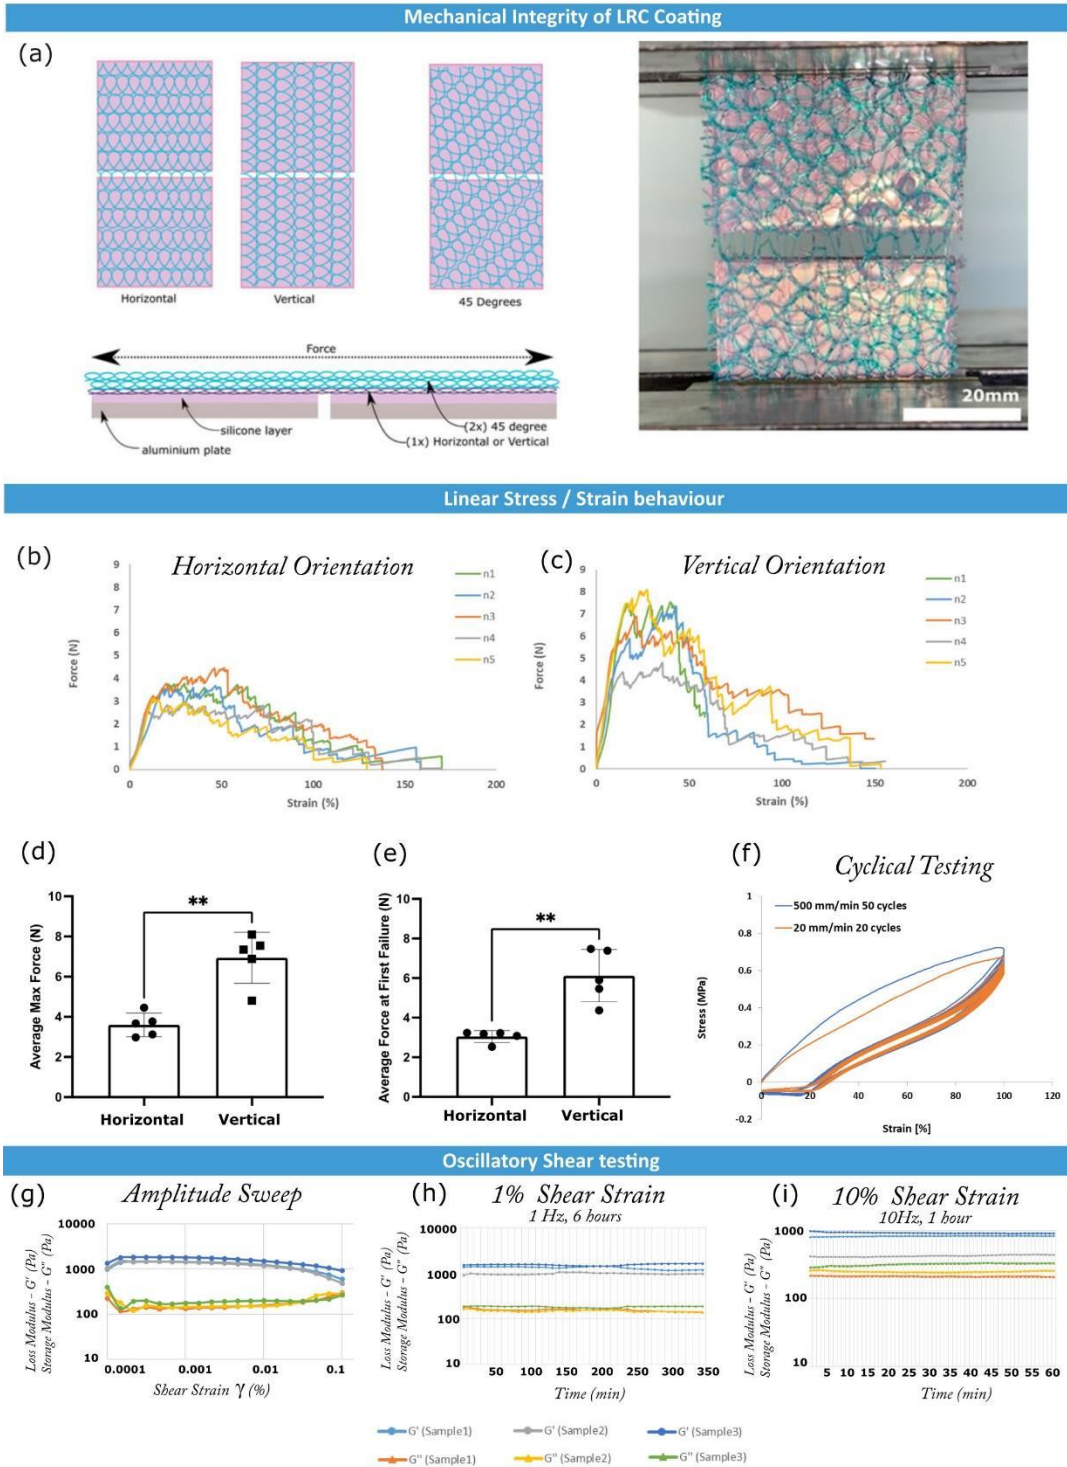

**Figure S3:** Mechanical Testing of Coating Integrity (A) Schematic of test specimen for Horizontal & Vertical LRC coating test. (B) Stress strain behaviour of Horizontal LRC Coating. Spikes in data are seen as each loop breaks. (C) Stress strain behaviour of Vertical LRC Coating (D) Average Maximum Force, n=6, p<0.01 (E) Average force at first filament break. n=6, p<0.01 (F) Cyclic testing of Substrate with bonded LRC coating, n=3 (G) Amplitude Sweep showing Loss and Storage Modulus against Shear Strain, n=3. (H) 1% Shear Strain at 1Hz plotted over time (I) 10% Shear Strain at 10Hz plotted over time, n=3.

### S3.0 Printer parameters for Spray Deposition

When spraying this emulsion, there are numerous factors that define the final nucleated crystal size including spray nozzle aperture, substrate temperature, material flow rate as well as the overall quantity of surfactant used in the emulsion.

The following settings resulted in a single deposited layer with a 5  $\mu\text{m}$  thickness (post-solvent evaporation)

|                        |          |                        |                |
|------------------------|----------|------------------------|----------------|
| Material pressure:     | 0.1 bar  | Feed rate:             | 800 mm/min     |
| Atomizing pressure:    | 0.15 bar | Nozzle aperture:       | 0.33 mm (23 G) |
| Substrate temperature: | 75°C     | Height from substrate: | 85 mm          |

Provided the silicone substrate surface to be coated is either still in an un-crosslinked state, or else recently cured (where the surface energy has not yet dissipated), then the sprayed coating bonds fully to the underlying layers. *Fig. 2(K)* shows the surface topology when the silicone/salt solution is sprayed on to a warm substrate, then subsequently cured. The nucleated salt crystals are visibly protruding through the silicone surface. *Fig. 2 (I)* shows a close-up of a single salt crystal. The inclusion of the PEG 6000 in the salt water solution has an interesting effect on how the salt crystals nucleate. Rather than the standard ortho-rhombic NaCl crystal a much more rounded, and random crystal emerges. By way of contrast, *Fig S4 (B)* shows the more classic NaCl crystal when PEG 6000 is not added.

After washing the salt crystals away in an ultrasonic bath, we see a highly porous and complex topology in *Fig. 2 (L)*, where the features are predominantly in the range of 2–8  $\mu\text{m}$ .. Looking closer at the pores, we can see an example in *Fig. 2 (J)*, where the pore created is in the 4–5  $\mu\text{m}$  range. We can also see a complex (random) surface inside the pores.

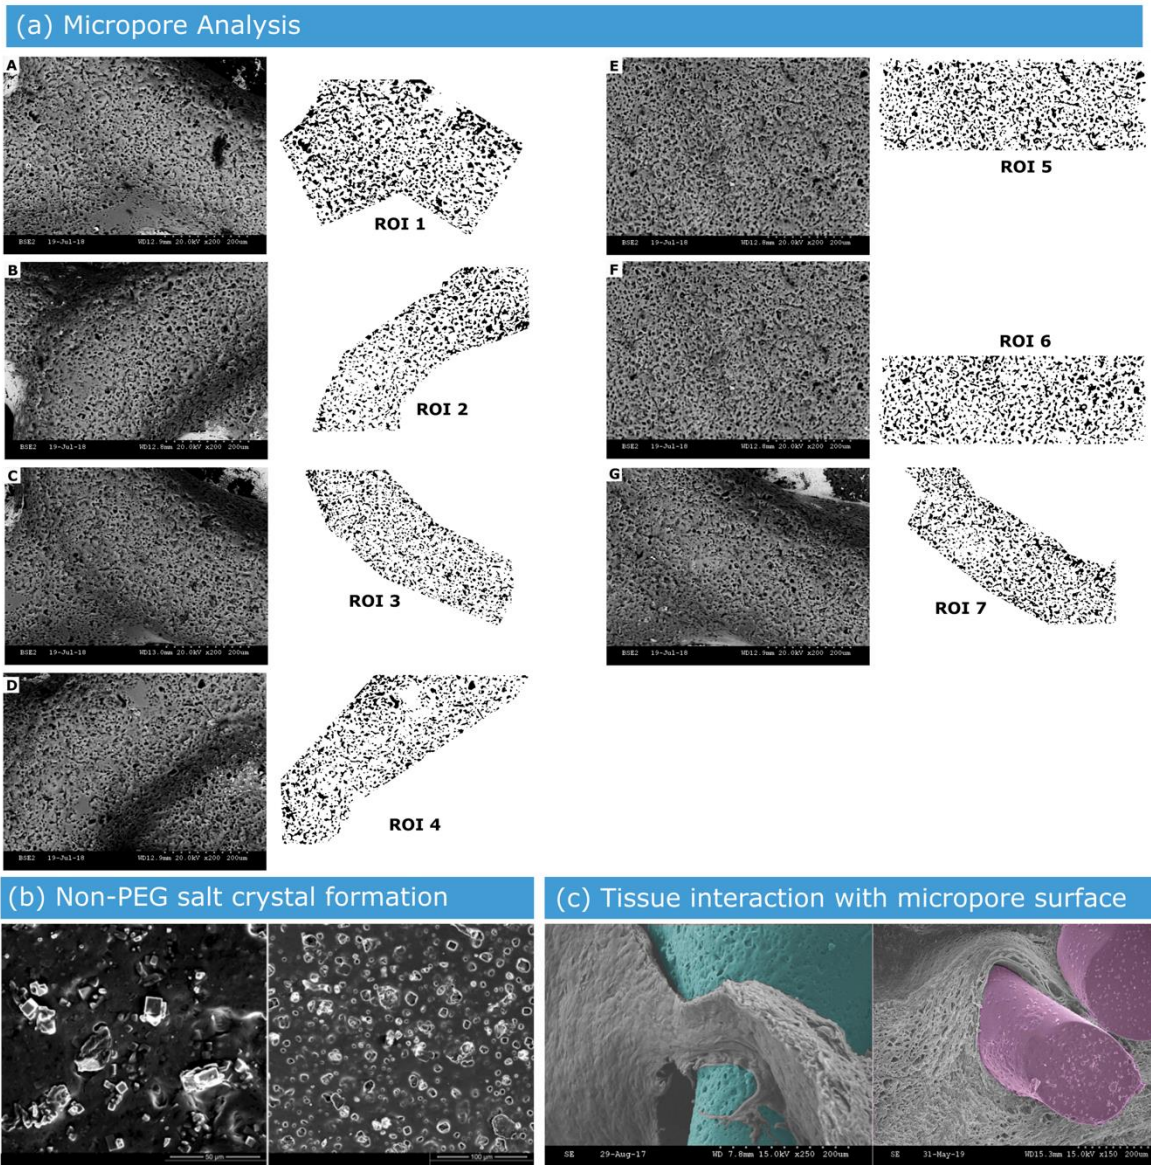

**Figure S4** (A) SEM Images of rope-coil layer that has been over sprayed to create a microporous surface texture. The corresponding Region of Interest is shown beside each micrograph. (B) Example of NaCl crystal structures if PEG is not added to ink formulation. (C) Example of tissue integration on a rope coil structure – blue is silicone on top side, pink is silicone on underside, where microporous spray does not deposit.

#### S4.0 Quantitative analysis of blood vessels

A systematic random sampling strategy was used. From each tissue section, ten non-overlapping images were taken of the tissue surrounding the device at 8× magnification. This tissue included both the immediate fibrous capsule and the tissue extending to the panniculus carnosus

muscle. Using Image J Fiji version 2.0.0, a simple point counting method was used to assess the volume fractions ( $V_v$ ) of the blood vessel. The numbers of points which coincided with blood vessels were counted. The volume fractions of blood vessels were then calculated by expressing the proportion of points hitting blood vessels as a fraction of the total number of points observed in the tissue, from which the final  $V_v$  was calculated.

Number per unit area, Length Density and Radial Diffusion Distance were all calculated using an unbiased counting grid. This counting frame consists of red forbidden lines and green acceptance lines. Any blood vessel that is cut by a forbidden line is not counted. Blood vessels that appear outside the counting frame or are cut by the acceptance lines without also cutting the forbidden line are counted. The application of this counting rule generates an unbiased estimate of the number of blood vessels per unit area. Number per unit area describes the number of blood vessels per unit area. It is estimated by dividing the number of blood vessels counted by the size of the area viewed. The length density of a blood vessel is the length of blood vessels present per unit volume. It is estimated by multiplying the number per unit area by 2. The radial diffusion distance provides a simple estimation of the cylindrical perfusion space surrounding a blood vessel.

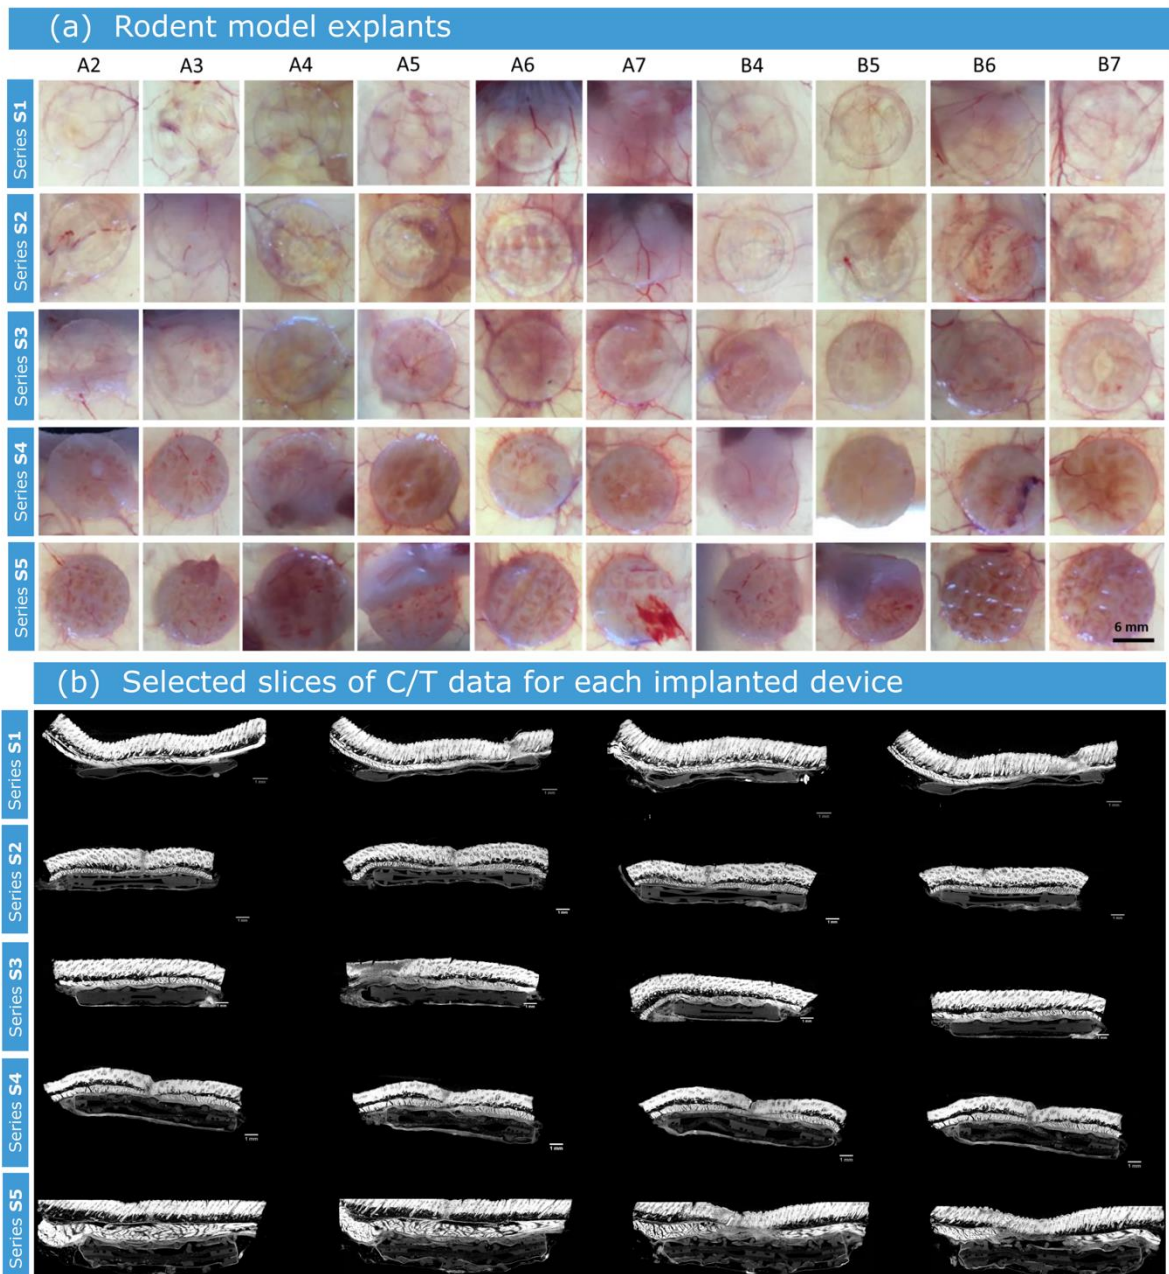

**Figure S5** (A) Transilluminated explants from all tested rodents. (B) Selected slices of C/T imagery from each type of implant.

#### S4.0 Fabrication of drug eluting pouch

The drug eluting pouch was constructed of two porous membranes with a rope-coil layer of NuSil MED4840 (Amplitude of 4.5mm) extruded onto the surface. This is followed by two rope-coil layers at 45° and 135° followed by over-spraying two salt/silicone solution layers. A layer containing an internal support structure was incorporated by extrusion of MED4840 in a pattern that

strengthened the device, prevented ballooning, and directed distal filling of the device cavity with an internal catheter. The drug eluting pouch also included a catheter attachment with one-way valve for unidirectional filling and fixation rings reinforced with surgical stainless steel to allow ease of handling and suture fixation of the device without risking damage to the body of the implant.

### **S5.0 Implantation of drug eluting pouch**

A submuscular implant site was used for preclinical efficacy testing of the drug eluting pouch (*Fig. S6*). To implant the device, a vertical incision was made just off midline and the dissection was carried down to the transversus abdominis fascia. A second vertical incision was made 15 cm lateral to the initial decision, and the dissection carried down to the transversus abdominis muscle. The space between the two incisions was bluntly dissected, and a rolled device was brought onto the surgical field with preloaded filling catheter placed. A PDMS loop was tied through the distal suture ring, and the device was passed through from the lateral to the medial incision, and then unfolded and positioned. Sutures were used to secure the device to underlying tissue through 4 suture rings. The fill line was then tunnelled through a 3<sup>rd</sup>, smaller lateral incision. Filling of the device was achieved through incremental filling of the inner fill line. Two mL of HA emulsion was injected (with either Iodixanol or PFDs). The fill line was then cut, plugged, and buried in the subcutaneous space.

## Porcine surgical procedure

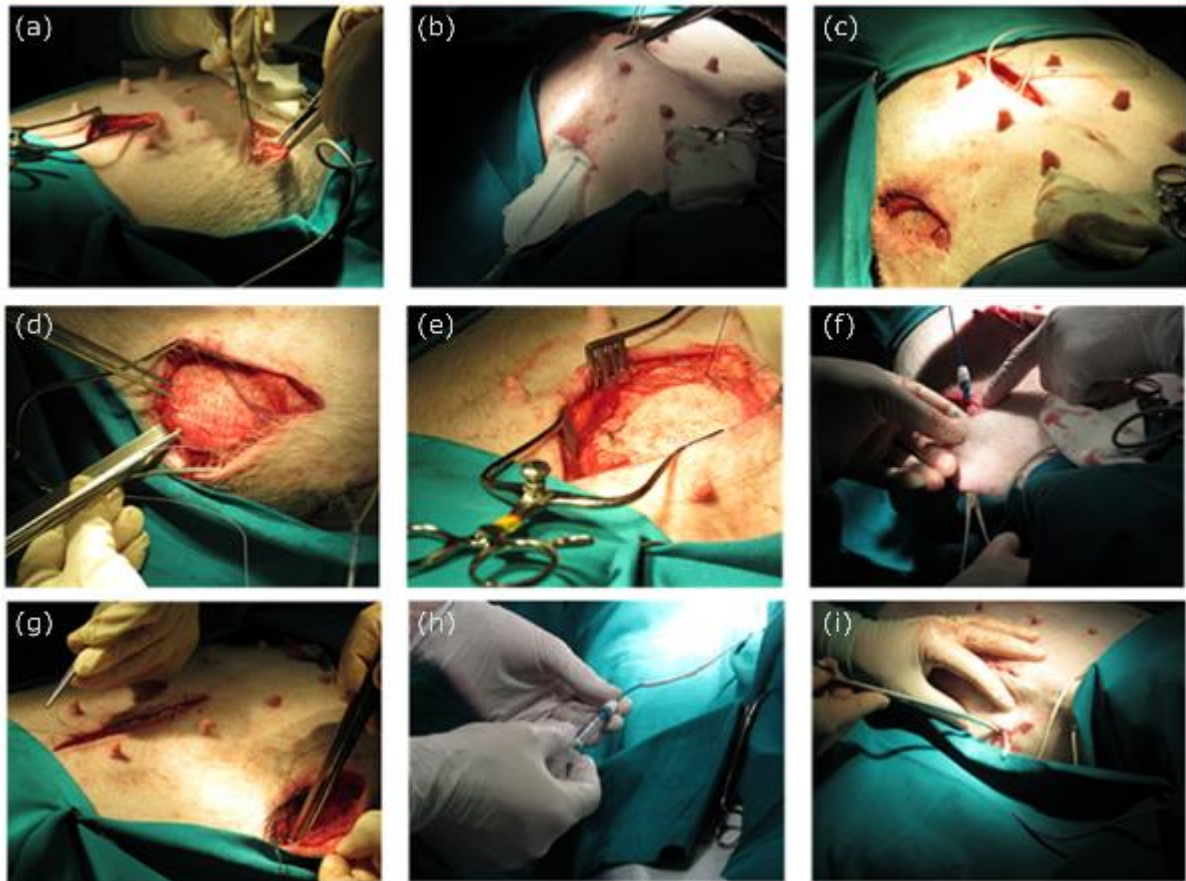

**Figure S6:** Images from surgical procedure **(a)** Incision and counter incision **(b)** device being pulled through incisions **(c)** positioning of device under rectus muscle **(d)** securing device to underlying tissue via suture rings **(e)** device sutured in place **(f)** tunnelling of infusion line in subcutaneous space **(g)** closure of incisions **(h)** filling of device **(i)** burying tubing in subcutaneous pocket.

**Table S1 :** Statistical Analysis methods for Histological analysis.

| Figure 6 |                           | n number | software               | Normality         |               |                                  |
|----------|---------------------------|----------|------------------------|-------------------|---------------|----------------------------------|
| D        | Fibrous Capsule Thickness | 5        | GraphPad Prism (8.1.0) | Shapiro Wilk Test | One way ANOVA | Tukeys Multiple Comparisons test |
| E        | Area of fibrous capsule   | 5        |                        | Shapiro Wilk Test | One way ANOVA | Kruskal-Wallis test              |



|                 |                                                                                                            |   |                        |                        |                          |                                  |  |
|-----------------|------------------------------------------------------------------------------------------------------------|---|------------------------|------------------------|--------------------------|----------------------------------|--|
| F               | Volume fraction of CD68 cells                                                                              | 5 |                        | Shapiro Wilk Test      | One way ANOVA            | Tukeys Multiple Comparisons test |  |
| G               | Volume fraction of M1 to M2-like macrophages                                                               | 5 |                        | Shapiro Wilk Test      | Two-way ANOVA            | Multiple Comparisons test        |  |
| <b>Figure 7</b> |                                                                                                            |   |                        |                        |                          |                                  |  |
| C               | Volume Fraction of Blood Vessels                                                                           | 5 | GraphPad Prism (8.1.0) | Shapiro Wilk Test      | One way ANOVA            | Tukeys Multiple Comparisons test |  |
| D               | Radial Diffusion Distance                                                                                  | 5 |                        |                        |                          |                                  |  |
| E               | Length Density of blood vessels                                                                            | 5 |                        |                        |                          |                                  |  |
| F               | Number of vessels per area                                                                                 | 5 |                        |                        |                          |                                  |  |
| G               | Ratio of $\alpha$ -SMA to CD31+ vessels.                                                                   | 5 |                        | Shapiro Wilk Test      | One way ANOVA            | Kruskal-Wallis test              |  |
| <b>Figure 8</b> |                                                                                                            |   |                        |                        |                          |                                  |  |
| L               | Subcutaneous insulin injection vs infusion through the implant                                             | 2 |                        | GraphPad Prism (8.1.0) | n too small              |                                  |  |
| M               | Pull-off testing of control smooth silicone and textured implant after 2 weeks of submuscular implantation | 3 | n too small            |                        | two tailed paired t-test |                                  |  |

**Table S2:** ANOVA for mean loop widths and amplitudes at different deposition heights (varying head speed and material flow rate)

| Mean loop widths (h=3mm)                  |                     |      |          |          |          |
|-------------------------------------------|---------------------|------|----------|----------|----------|
| Flow Rate<br>( $\mu\text{l}/\text{min}$ ) | Head Speed (mm/min) |      |          |          | Mean     |
|                                           | 600                 | 800  | 1000     | 1200     |          |
| 140                                       | 7.63                | 7.42 | 7.59     | 7.55     | 7.55     |
| 180                                       | 7.39                | 7.68 | 7.64     | 8.00     | 7.68     |
| 220                                       | 7.55                | 7.92 | 7.78     | 7.86     | 7.78     |
| 260                                       | 7.42                | 7.68 | 8.29     | 8.25     | 7.91     |
| Overall                                   | 7.50                | 7.67 | 7.83     | 7.91     |          |
| ANOVA                                     |                     |      |          |          |          |
| Source of Variation                       | SS                  | df   | MS       | F        | P-value  |
| Flow Rate                                 | 1.120734            | 3    | 0.373578 | 2.793601 | 0.050258 |
| Head Speed                                | 1.598339            | 3    | 0.53278  | 3.984105 | 0.012972 |
| Interaction                               | 1.768998            | 9    | 0.196555 | 1.469833 | 0.186401 |
| Error                                     | 6.418862            | 48   | 0.133726 |          |          |
| Total                                     | 10.90693            | 63   |          |          |          |

| Mean loop amplitudes (h=3mm)              |                     |       |          |          |          |
|-------------------------------------------|---------------------|-------|----------|----------|----------|
| Flow Rate<br>( $\mu\text{l}/\text{min}$ ) | Head Speed (mm/min) |       |          |          | Mean     |
|                                           | 600                 | 800   | 1000     | 1200     |          |
| 140                                       | 10.25               | 11.68 | 11.84    | 11.26    | 11.26    |
| 180                                       | 9.14                | 10.21 | 11.14    | 11.82    | 10.58    |
| 220                                       | 10.05               | 10.32 | 11.29    | 11.47    | 10.78    |
| 260                                       | 10.25               | 10.53 | 10.91    | 11.18    | 10.72    |
| Overall                                   | 9.92                | 10.69 | 11.29    | 11.43    |          |
| ANOVA                                     |                     |       |          |          |          |
| Source of Variation                       | SS                  | df    | MS       | F        | P-value  |
| Flow Rate                                 | 3.130283            | 3     | 1.043428 | 10.95598 | 4.16E-05 |
| Head Speed                                | 17.09687            | 3     | 5.698956 | 59.83897 | 3.22E-13 |
| Interaction                               | 5.66865             | 9     | 0.62985  | 6.613418 | 2.75E-05 |
| Error                                     | 3.047622            | 32    | 0.095238 |          |          |
| Total                                     | 28.94342            | 47    |          |          |          |

| Mean loop widths (h=6mm)                  |                     |       |          |          |          |
|-------------------------------------------|---------------------|-------|----------|----------|----------|
| Flow Rate<br>( $\mu\text{l}/\text{min}$ ) | Head Speed (mm/min) |       |          |          | Mean     |
|                                           | 600                 | 800   | 1000     | 1200     |          |
| 140                                       | 14.68               | 12.90 | 11.56    | 11.63    | 12.69    |
| 180                                       | 14.18               | 14.15 | 12.98    | 12.22    | 13.38    |
| 220                                       | 16.37               | 14.32 | 12.98    | 13.50    | 14.29    |
| 260                                       | 16.94               | 14.87 | 14.87    | 14.45    | 15.28    |
| Overall                                   | 15.54               | 14.06 | 13.09    | 12.95    |          |
| ANOVA                                     |                     |       |          |          |          |
| Source of Variation                       | SS                  | df    | MS       | F        | P-value  |
| Flow Rate                                 | 60.65413            | 3     | 20.21804 | 48.79802 | 1.29E-14 |
| Head Speed                                | 68.50907            | 3     | 22.83636 | 55.11755 | 1.41E-15 |
| Interaction                               | 10.0846             | 9     | 1.120511 | 2.704451 | 0.012432 |
| Error                                     | 19.88741            | 48    | 0.414321 |          |          |
| Total                                     | 159.1352            | 63    |          |          |          |

| Mean loop amplitudes (h=6mm)              |                     |       |          |          |          |
|-------------------------------------------|---------------------|-------|----------|----------|----------|
| Flow Rate<br>( $\mu\text{l}/\text{min}$ ) | Head Speed (mm/min) |       |          |          | Mean     |
|                                           | 600                 | 800   | 1000     | 1200     |          |
| 140                                       | 21.62               | 21.21 | 23.53    | 24.10    | 22.62    |
| 180                                       | 21.91               | 22.01 | 23.58    | 23.54    | 22.76    |
| 220                                       | 23.31               | 23.21 | 24.02    | 25.29    | 23.96    |
| 260                                       | 22.82               | 23.84 | 24.97    | 25.74    | 24.34    |
| Overall                                   | 22.42               | 22.57 | 24.02    | 24.67    |          |
| ANOVA                                     |                     |       |          |          |          |
| Source of Variation                       | SS                  | df    | MS       | F        | P-value  |
| Flow Rate                                 | 26.66475            | 3     | 8.888251 | 36.91351 | 1.67E-10 |
| Head Speed                                | 43.88703            | 3     | 14.62901 | 60.75528 | 2.62E-13 |
| Interaction                               | 4.814883            | 9     | 0.534987 | 2.221838 | 0.04686  |
| Error                                     | 7.705147            | 32    | 0.240786 |          |          |
| Total                                     | 83.07181            | 47    |          |          |          |

| Mean loop widths (h=9mm)                  |                     |          |          |          |          |
|-------------------------------------------|---------------------|----------|----------|----------|----------|
| Flow Rate<br>( $\mu\text{l}/\text{min}$ ) | Head Speed (mm/min) |          |          |          | Mean     |
|                                           | 600                 | 800      | 1000     | 1200     |          |
| 140                                       | 17.841              | 16.28675 | 15.73325 | 16.62033 | 16.62033 |
| 180                                       | 18.17               | 18.89    | 17.21    | 14.37    | 17.16    |
| 220                                       | 20.43               | 19.90    | 18.64    | 16.98    | 18.99    |
| 260                                       | 22.10               | 19.89    | 19.24    | 18.40    | 19.91    |
| Overall                                   | 19.64               | 18.74    | 17.71    | 16.59    |          |
| ANOVA                                     |                     |          |          |          |          |
| Source of Variation                       | SS                  | df       | MS       | F        | P-value  |
| Flow Rate                                 | 113.7177            | 3        | 37.90591 | 69.74152 | 1.62E-17 |
| Head Speed                                | 82.87638            | 3        | 27.62546 | 50.82693 | 6.2E-15  |
| Interaction                               | 32.26165            | 9        | 3.584628 | 6.595207 | 4.57E-06 |
| Error                                     | 26.08896            | 48       | 0.54352  |          |          |
| Total                                     | 254.9447            | 63       |          |          |          |

| Mean loop amplitudes (h=9mm)              |                     |       |          |          |          |
|-------------------------------------------|---------------------|-------|----------|----------|----------|
| Flow Rate<br>( $\mu\text{l}/\text{min}$ ) | Head Speed (mm/min) |       |          |          | Mean     |
|                                           | 600                 | 800   | 1000     | 1200     |          |
| 140                                       | 26.63               | 26.70 | 27.71    | 27.01    | 27.01    |
| 180                                       | 27.52               | 27.92 | 28.55    | 28.63    | 28.16    |
| 220                                       | 27.67               | 28.59 | 28.67    | 28.86    | 28.45    |
| 260                                       | 28.48               | 28.96 | 28.59    | 29.54    | 28.89    |
| Overall                                   | 27.57               | 28.04 | 28.38    | 28.51    |          |
| ANOVA                                     |                     |       |          |          |          |
| Source of Variation                       | SS                  | df    | MS       | F        | P-value  |
| Flow Rate                                 | 23.14967            | 3     | 7.716556 | 5.207164 | 0.004833 |
| Head Speed                                | 6.313145            | 3     | 2.104382 | 1.420046 | 0.255005 |
| Interaction                               | 3.032002            | 9     | 0.336889 | 0.227334 | 0.988026 |
| Error                                     | 47.42116            | 32    | 1.481911 |          |          |
| Total                                     | 79.91598            | 47    |          |          |          |

**Table S3:** Analysis of Curvature, 2D Voids, LCR Coating Heights and Micropore distribution

(a) Curvature Analysis

| Sample # | Mean   | StDev  | Median | Quantile 5 | Quantile 25 | Quantile 50 | Quantile 75 | Quantile 95 |
|----------|--------|--------|--------|------------|-------------|-------------|-------------|-------------|
| 1        | 0.0385 | 0.0652 | 0.0456 | -0.0784    | 0.0039      | 0.0456      | 0.0795      | 0.1311      |
| 2        | 0.0389 | 0.0654 | 0.0461 | -0.0783    | 0.0037      | 0.0461      | 0.0806      | 0.1318      |
| 3        | 0.0368 | 0.0663 | 0.0435 | -0.0817    | 0.0013      | 0.0435      | 0.0784      | 0.1317      |
| 4        | 0.0384 | 0.0648 | 0.0450 | -0.0772    | 0.0043      | 0.0450      | 0.0786      | 0.1310      |
| 5        | 0.0418 | 0.0662 | 0.0480 | -0.0753    | 0.0055      | 0.0480      | 0.0836      | 0.1376      |
| 6        | 0.0431 | 0.0644 | 0.0494 | -0.0704    | 0.0079      | 0.0494      | 0.0832      | 0.1355      |

| ANOVA (All 6 groups) |          |    |          |                 |                   |                 |
|----------------------|----------|----|----------|-----------------|-------------------|-----------------|
| Source of Variation  | SS       | df | MS       | F               | P-value           | F crit          |
| Between Groups       | 0.000277 | 5  | 5.54E-05 | <b>6.857043</b> | <b>4.1964E-05</b> | <b>2.370977</b> |
| Within Groups        | 0.000476 | 59 | 8.07E-06 |                 |                   |                 |
| Total                | 0.000753 | 64 |          |                 |                   |                 |

  

| ANOVA (Groups 1 to 4) |          |    |          |                 |                   |                 |
|-----------------------|----------|----|----------|-----------------|-------------------|-----------------|
| Source of Variation   | SS       | df | MS       | F               | P-value           | F crit          |
| Between Groups        | 1.27E-05 | 3  | 4.22E-06 | <b>0.569478</b> | <b>0.63836196</b> | <b>2.838745</b> |
| Within Groups         | 0.000297 | 40 | 7.42E-06 |                 |                   |                 |
| Total                 | 0.000309 | 43 |          |                 |                   |                 |

  

| ANOVA (Groups 5 & 6) |          |    |          |                 |                   |                |
|----------------------|----------|----|----------|-----------------|-------------------|----------------|
| Source of Variation  | SS       | df | MS       | F               | P-value           | F crit         |
| Between Groups       | 2.94E-06 | 1  | 2.94E-06 | <b>0.310497</b> | <b>0.58388063</b> | <b>4.38075</b> |
| Within Groups        | 0.00018  | 19 | 9.46E-06 |                 |                   |                |
| Total                | 0.000183 | 20 |          |                 |                   |                |

(b) 2D Void Analysis

| Sample # | Mean   | StDev  | Median | Quantile 5 | Quantile 25 | Quantile 50 | Quantile 75 | Quantile 95 |
|----------|--------|--------|--------|------------|-------------|-------------|-------------|-------------|
| 1        | 0.4995 | 0.5508 | 0.2840 | 0.0698     | 0.1432      | 0.2840      | 0.5952      | 1.7082      |
| 2        | 0.4361 | 0.5220 | 0.2473 | 0.0687     | 0.1242      | 0.2473      | 0.4872      | 1.5277      |
| 3        | 0.4904 | 0.6111 | 0.2905 | 0.0698     | 0.1242      | 0.2905      | 0.5857      | 1.6519      |
| 4        | 0.5006 | 0.5524 | 0.2946 | 0.0722     | 0.1441      | 0.2946      | 0.6357      | 1.7023      |
| 5        | 0.4762 | 0.5881 | 0.2307 | 0.0698     | 0.1207      | 0.2307      | 0.5588      | 1.8518      |
| 6        | 0.5099 | 0.6360 | 0.2633 | 0.0730     | 0.1296      | 0.2633      | 0.6354      | 1.7771      |

| ANOVA               |          |    |          |                 |                 |                 |
|---------------------|----------|----|----------|-----------------|-----------------|-----------------|
| Source of Variation | SS       | df | MS       | F               | P-value         | F crit          |
| Between Groups      | 0.028781 | 5  | 0.005756 | <b>1.693881</b> | <b>0.166535</b> | <b>2.533555</b> |
| Within Groups       | 0.00018  | 30 | 0.003398 |                 |                 |                 |
| Total               | 0.130728 | 35 |          |                 |                 |                 |

(c) Coating height analysis

| Sample # | Mean     | StDev    | Median   | Quantile 5 | Quantile 25 | Quantile 50 | Quantile 75 | Quantile 95 |
|----------|----------|----------|----------|------------|-------------|-------------|-------------|-------------|
| 1        | 969.7518 | 215.0903 | 943.4582 | 672.9562   | 791.7131    | 943.4582    | 1134.7888   | 1352.5100   |
| 2        | 926.9596 | 224.0915 | 887.5219 | 626.4861   | 730.9004    | 887.5219    | 1096.3506   | 1331.2829   |
| 3        | 915.3792 | 241.0058 | 872.7131 | 583.9960   | 708.6693    | 872.7131    | 1115.4980   | 1338.5976   |
| 4        | 952.8900 | 211.6757 | 926.1116 | 665.2351   | 776.1076    | 926.1116    | 1121.7689   | 1317.4263   |
| 5        | 918.7837 | 223.8550 | 875.6175 | 623.5458   | 729.6813    | 875.6175    | 1094.5219   | 1326.6932   |
| 6        | 906.7814 | 208.8657 | 872.7649 | 627.8884   | 728.3506    | 872.7649    | 1067.4104   | 1280.8924   |
| 7        | 913.4252 | 232.6037 | 881.8327 | 604.4821   | 711.1554    | 881.8327    | 1088.0677   | 1322.7490   |
| 8        | 897.3027 | 229.5567 | 863.3625 | 593.5618   | 708.2271    | 863.3625    | 1058.9681   | 1315.2789   |
| 9        | 951.5411 | 227.8259 | 915.8566 | 647.6414   | 752.3108    | 915.8566    | 1125.1952   | 1354.1594   |
| 10       | 912.5854 | 229.7739 | 897.6175 | 600.8845   | 712.1594    | 897.6175    | 1090.4940   | 1313.0438   |
| 11       | 886.9024 | 209.9450 | 848.0080 | 604.7809   | 716.5339    | 848.0080    | 1051.7928   | 1255.5777   |
| 12       | 873.9120 | 197.3928 | 832.4502 | 622.7490   | 711.7131    | 832.4502    | 1016.7331   | 1232.7888   |
| 13       | 917.6615 | 237.8304 | 876.8566 | 614.4900   | 711.1514    | 876.8566    | 1097.7968   | 1346.3546   |

| ANOVA               |          |    |          |                 |                 |                 |
|---------------------|----------|----|----------|-----------------|-----------------|-----------------|
| Source of Variation | SS       | df | MS       | F               | P-value         | F crit          |
| Between Groups      | 30048.54 | 9  | 3338.726 | <b>1.704572</b> | <b>0.112721</b> | <b>2.073351</b> |
| Within Groups       | 97934.42 | 50 | 1958.688 |                 |                 |                 |
| Total               | 127983   | 59 |          |                 |                 |                 |

(d) Micropore distribution analysis -  $\sqrt{\text{Area}}$  (in  $\mu\text{m}$ )

|       | Median | 1st Ventile (D5) | 1st Decile (D10) | 1st Quartile (D25) | 2nd Quartile (D50) | 3rd Quartile (D75) | 9th Decile (D90) | 19th Ventile (D95) | Span (D90-D10)/D50 |
|-------|--------|------------------|------------------|--------------------|--------------------|--------------------|------------------|--------------------|--------------------|
| ROI-1 | 3.8406 | 1.5811           | 2.2913           | 2.5000             | 3.8406             | 6.1644             | 9.1924           | 11.7686            | 1.9425             |
| ROI-2 | 4.1833 | 1.5811           | 2.3452           | 2.6458             | 4.1833             | 6.9282             | 10.0772          | 11.9080            | 1.9478             |
| ROI-3 | 3.6056 | 1.6583           | 2.2361           | 2.4495             | 3.6056             | 5.7228             | 8.0607           | 9.8698             | 1.7274             |
| ROI-4 | 3.8079 | 1.5811           | 2.2361           | 2.5000             | 3.8079             | 5.9582             | 8.6890           | 10.8408            | 1.7930             |
| ROI-5 | 4.3875 | 1.5811           | 2.3979           | 2.6458             | 4.3875             | 6.3738             | 9.0802           | 11.0565            | 1.6372             |
| ROI-6 | 4.7697 | 1.7321           | 2.7386           | 3.0414             | 4.7697             | 7.8422             | 10.9510          | 13.5940            | 1.8486             |
| ROI-7 | 4.0620 | 1.5811           | 2.2361           | 2.5000             | 4.0620             | 6.7639             | 9.2736           | 11.9478            | 1.8254             |
